# Supplementary material
Source: publisher site journal article supplement (https://www.spandidos-publications.com/7012/downloadSupplementary)
Supplement: Supplementary file 1 [file downloadSupplementary]

## Sheet: Sheet1
Table SV. Prognostic values of the PRGs in patients with colorectal cancer.
id	HR	HR.95L	HR.95H	P-value	km
BAK1	0.927957	0.74507	1.15574	0.504382	0.0498624
BAX	0.890216	0.7294	1.08649	0.252638	0.0158897
CASP1	0.863614	0.782584	0.953033	0.00353475	0.00348543
CASP3	0.773259	0.632316	0.945618	0.0122588	0.000232272
CASP4	1.14934	0.948605	1.39256	0.155254	0.0161887
CASP5	0.924522	0.834332	1.02446	0.134002	0.0303479
CHMP2A	0.979297	0.73362	1.30725	0.887117	0.20967
CHMP2B	0.947213	0.777832	1.15348	0.589532	0.105285
CHMP4B	0.910834	0.74691	1.11073	0.356235	0.00404911
CHMP4C	0.949702	0.818427	1.10204	0.496561	0.0153883
CHMP6	0.796319	0.597147	1.06192	0.120936	9.2218e-05
CHMP7	0.877596	0.708674	1.08678	0.231302	0.0149554
CYCS	0.836484	0.702228	0.996409	0.0454712	0.010251
ELANE	0.95587	0.605254	1.50959	0.846506	0.152572
GSDMD	0.918705	0.754705	1.11834	0.398036	0.0756432
GZMB	0.882619	0.817483	0.952945	0.00141196	9.73979e-07
HMGB1	0.956792	0.812883	1.12618	0.595339	0.0414057
IL18	0.920698	0.814394	1.04088	0.186859	0.00346217
IL1A	1.00332	0.881268	1.14228	0.960058	0.014825
IL1B	0.982662	0.903943	1.06824	0.681401	0.0430941
IRF1	0.842222	0.725278	0.978021	0.0243632	5.00655e-05
IRF2	1.06787	0.837942	1.36088	0.595578	0.103971
TP53	0.980068	0.881657	1.08946	0.709218	0.00807554
TP63	1.3224	0.958618	1.82423	0.0886646	0.00595509
AIM2	0.991703	0.90251	1.08971	0.862435	0.204158
CASP6	0.745857	0.618361	0.899642	0.00217161	0.000235069
CASP8	0.863393	0.673059	1.10755	0.247676	0.0389638
CASP9	0.894853	0.624458	1.28233	0.545031	0.205421
GPX4	1.08302	0.88371	1.32729	0.442132	0.0280431
GSDMB	0.963763	0.8223	1.12956	0.648592	0.0364633
GSDMC	1.24567	0.91641	1.69323	0.160733	0.0356864
IL6	1.05136	0.966478	1.14369	0.243582	0.0102414
NLRC4	1.23745	0.933394	1.64056	0.138641	0.00936221
NLRP1	1.34093	1.12106	1.60393	0.00132458	2.87929e-05
NLRP2	1.03455	0.944321	1.1334	0.465677	0.0594285
NLRP3	1.12457	0.892708	1.41665	0.318978	0.0494592
NLRP6	0.86819	0.747841	1.00791	0.0633808	0.0157781
NLRP7	0.832438	0.530281	1.30676	0.425396	0.0662008
NOD1	1.28081	0.984797	1.66581	0.0649338	0.0209268
NOD2	0.896193	0.772535	1.03964	0.147964	0.00526792
PLCG1	1.11971	0.918767	1.36461	0.262523	0.0241509
PRKACA	1.34184	0.956625	1.88218	0.0885455	0.00565907
PYCARD	0.952367	0.829197	1.09383	0.489754	0.0547892
SCAF11	1.03869	0.845584	1.27589	0.71758	0.0950245
TIRAP	1.02615	0.74873	1.40637	0.872459	0.117472
TNF	0.981201	0.790457	1.21797	0.863377	0.00926342
GZMA	0.956525	0.87508	1.04555	0.327608	0.00760966
